1 **The Influence of Aging and Mechanical Stretch in Alveolar Epithelium ER Stress and**  
2 **Inflammation**

3  
4  
5 Valentine MS<sup>1</sup>, Herbert JA<sup>1</sup>, Link PA<sup>1</sup>, Kamga Gninzeko F<sup>1</sup>, Schneck MB<sup>1</sup>, Shankar K<sup>1</sup>,  
6 Nkwocha J<sup>1</sup>, Reynolds AM<sup>2,3</sup>, Heise RL<sup>1,3</sup>.

- 7  
8 1. Department of Biomedical Engineering, Virginia Commonwealth University  
9 2. Department of Mathematics and Applied Mathematics, Virginia Commonwealth  
10 University  
11 3. Victoria Johnson Center for Lung Disease Research, Virginia Commonwealth University  
12  
13  
14  
15  
16  
17  
18  
19  
20  
21  
22  
23

24 Running Header: Age and Stretch Influence Alveolar Epithelium Inflammation  
25  
26  
27  
28  
29  
30  
31  
32  
33  
34  
35

36 To Whom All Correspondence/Reprints Should Be Addressed:  
37

38 Rebecca L. Heise, Ph.D  
39 [Associate Professor](#)  
40 [Department of Biomedical Engineering](#)  
41 [Virginia Commonwealth University](#)  
42 [PO Box 843067](#)  
43 [Richmond, VA 23284](#)  
44 [rlheise@vcu.edu](mailto:rlheise@vcu.edu)  
45  
46

1  
2  
3  
4  
5  
6  
7  
8  
9  
10  
11  
12  
13  
14  
15  
16  
17  
18  
19  
20  
21  
22  
23  
24  
25  
26  
27  
28  
29  
30  
31  
32  
33

## **Abstract**

Ventilator-Induced lung injury (VILI) is a form of acute lung injury that is initiated or exacerbated by mechanical ventilation. The aging lung is more susceptible to lung injury. Harmful mechanical stretch of the alveolar epithelium is a recognized mechanism of VILI, yet little is known about how mechanical stretch affects aged epithelial cells. An activated response known as Endoplasmic Reticulum (ER) Stress occurs at the cellular level, which is increased with aging. The disrupted ER function results in disruption in cellular homeostasis, apoptosis, and inflammation. We hypothesized that age and mechanical stretch increase proinflammatory gene expression that is mediated by ER stress. Type II alveolar epithelial cells (ATII) were harvested from C57Bl6/J mice 8 weeks (young) and 20 months (old) of age. The cells were cyclically mechanically stretched at 15% change in surface area for up to 24 hours. Prior to stretch, groups were administered 4-PBA or vehicle as a control. Mechanical stretch upregulated both ER stress and proinflammatory gene expression in ATII. Age-matched and mis-matched monocyte recruitment by ATII conditioned media was quantified. Administration of 4-PBA attenuated both the ER stress and proinflammatory increases from stretch and/or age and significantly reduced monocyte migration to ATII conditioned media. Age increases susceptibility to stretch-induced ER stress and downstream inflammation in a primary ATII epithelial cell model.

## 1 **Introduction**

2           Mechanical ventilation frequently exacerbates underlying pulmonary conditions and  
3 produces an exaggerated inflammatory response that potentially leads to sepsis and multisystem  
4 organ failure (40). This exacerbation or injury is classified as Ventilator-Induced Lung Injury  
5 (VILI). The pathophysiology of VILI is characterized by an exaggerated proinflammatory  
6 cytokine release and influx of inflammatory cells, loss of alveolar barrier integrity and  
7 subsequent pulmonary edema formation, decreased lung compliance, and profound hypoxia.  
8 These features reflect three integrated mechanisms of injury: alveolar over-distention, cyclic  
9 atelectasis, and inflammatory cell activation (19, 46). These physical injury mechanisms are  
10 frequently modeled *in vitro* with mechanical cyclic stretch using lung epithelial or endothelial  
11 cells.

12           Alveolar epithelial cells contribute to the initiation, amplification, and resolution of  
13 inflammatory processes in the lung. Epithelial cells produce inflammatory mediators assumed to  
14 be involved in the recruitment and regulation of macrophages (13, 55). Furthermore, cyclic  
15 stretch on epithelial cells grown on deformable membranes has also shown to cause injury and  
16 induce cytokine release by alveolar epithelial cells (58). Cyclic stretch of alveolar epithelial cells  
17 resulted in increased cell injury and death, increased apoptosis, increased acidification and  
18 bacterial growth, and increased general inflammatory response, often shown with amplified gene  
19 expression and release of IL-6 and IL-8 (11, 29, 58). Together, these observations validate that  
20 alveolar epithelial cells are involved with the mechanotransduction and exaggerated  
21 inflammatory response that is characteristic of VILI.

22           Mechanical ventilation leads to poorer outcomes in the elderly population. Mortality rates  
23 and hospital discharge to extended care facilities increased consistently for each decade of age

1 over the age of 65 years in mechanically ventilated patients (20). Epidemiological studies suggest  
2 that age is a predictive factor in the severity of VILI; however, the exact molecular mechanisms  
3 between age and VILI are still unknown (14, 47, 51). In rodent models of VILI, we and others  
4 have shown that age increases susceptibility to ventilator-induced edema, injury, and mortality  
5 (1, 31). In general, advanced age is also known to promote an increasingly dysregulated innate  
6 immune/inflammatory response to injury with an overall shift towards a proinflammatory state  
7 (21). Aging promotes chronic inflammation in the murine lung (2) and inhibits repair of the lung  
8 epithelium following influenza insult (62). Better understanding these age-associated  
9 interactions are critical to developing therapeutic approaches that aim to target the possible age-  
10 associated mechanisms of injury related to the pathophysiology of VILI.

11 One potential regulator of age-associated inflammation is the endoplasmic reticulum  
12 (ER). The ER is a multifunctional organelle responsible for lipid biosynthesis, calcium storage,  
13 and protein folding and processing. Due to the innate inefficiency of protein folding, there can  
14 be as many as 30% of proteins that never acquire their fully folded, programmed conformation  
15 (49). Prolonged unresolved ER stress can lead to the accumulation of misfolded proteins,  
16 disruption of cellular functions, cellular apoptosis, and has been shown to play a key role in  
17 many chronic inflammatory disease states (17). Specifically, ER stress has been shown to  
18 regulate apoptosis and epithelial to mesenchymal transition in alveolar epithelial cells (63).

19 ER-stress also becomes increasingly dysregulated with age (45). There is a general age-  
20 associated increase in the occurrence of protein misfolding and accumulation. Unsurprisingly ER  
21 stress is implicated as a promoter of many pathological disease states associated with aging (6,  
22 45). Additionally, lung-related ER stress is implicated in the age-associated increase in  
23 pulmonary fibrosis (36).

1           While numerous studies have shown convincing evidence for the dominant role of ER  
2 stress in various inflammatory disease states, there have only been a few studies investigating ER  
3 stress in the context of acute lung injury and/or ventilator-induced lung injury. Several ER stress  
4 pathway proteins are key modulators of epithelial permeability and barrier dysfunction in young  
5 mice and rats (17, 63). It was demonstrated that extended epithelial stretch activates ER stress  
6 pathways, which resulted in increased alveolar permeability, cell death, and proinflammatory  
7 signaling (16); however, these implications have yet to be investigated in an aging model. To  
8 further validate that therapeutic targeting of the ER stress response may attenuate VILI, these  
9 inferences need to be investigated in the context of aging to understand the potential therapeutic  
10 targets.

11           We hypothesized that the alveolar type II (ATII) cells respond age-dependently to  
12 mechanical stretch with increased inflammation and monocyte recruitment, dependent upon ER  
13 stress. To investigate this relationship, we isolated and cultured primary alveolar epithelial ATII  
14 from young and old murine subjects. These cells were exposed to cyclic mechanical stretch to  
15 model alveolar distension. We measured age-associated differences in ER stress response, cell  
16 injury/inflammation, and apoptosis. We inhibited ER stress using the chaperone 4-  
17 phenylbutyrate (4-PBA) (35). Additionally, we quantified the migration of bone marrow-derived  
18 monocytes to ATII conditioned media.

19

## 20 **Materials and Methods:**

21 All animals are housed in accordance with guidelines from the American Association for  
22 Laboratory Animal Care and Research protocols and approved by the Institutional Animal Care  
23 Use Committee at Virginia Commonwealth University (Protocol No. AD1000009).

1 **ATII cell isolation and culture:** We harvested, isolated, and cultured ATII primary alveolar  
2 epithelial cells from young (8 weeks) and old (20 months) C57BL/6J wild-type mice using  
3 previously cited methods (12). ATII were then cultured in Bronchial Epithelial Cell Growth  
4 Media (BEGM, Lonza), with the included supplements except for hydrocortisone, supplemented  
5 with 10 ng/ml keratinocyte growth factor (KGF, PeproTech). ATII were found to be greater than  
6 93% pure in both young and old cultures by staining for positive pro-surfactant C and the  
7 inclusion of lamellar bodies. For stretch experiments, cells were plated onto Collagen I-coated,  
8 6-well silicone bottomed plates (Flexcell International Corp., BF-3001A BioFlex) and cultured  
9 for 48 hours prior to mechanical stimulation.

10

11 **Cell Stretch:** Using the Flexcell Tension Plus System (Flexcell Inc), we applied radial, cyclic  
12 (0.86Hz) stretch corresponding to a 15% change in surface area. Statically cultured ATII cells  
13 were used as controls. Cells underwent stretch or static conditions, and after 4 hours or 24 hours,  
14 RLT buffer (Qiagen) or 4% paraformaldehyde were added to wells for further processing. Cell  
15 supernatants were collected for cytokine analysis and conditioned media experiments.

16

17 **ER Stress Intervention:** One hour before mechanical stretch, each well received either 20ul  
18 vehicle (ultrapure water) or 10 mM sodium 4-phenylbulyrate (PBA) (Calbiochem, San Diego,  
19 CA) in ultrapure water. 4-PBA is already in use clinically as a successful treatment for systemic  
20 inflammatory diseases such as diabetes (61).

21

22 **Immunofluorescence Staining for CHOP, ATF4:** Fixed wells were probed for CHOP (L63F7)  
23 mouse mAB (1:3200) and ATF-4 (D4B8) rabbit mAB (1:200) using secondary antibodies anti-

1 mouse Alexa Fluor® 594 conjugate (1:250) and anti-rabbit Alexa Fluor® 488 conjugate  
2 respectively. All primary and secondary antibodies were obtained from Cell Signaling  
3 Technology (Danvers, MA, USA). The counterstaining was done using Prolong® Gold antifade  
4 mounting with DAPI (ThermoFisher, Waltham, MA, USA). Finally, samples were imaged with  
5 an Olympus IX71 under appropriate emission/excitation wavelengths.

6  
7 **Quantitative real-time Polymerase Chain Reaction:** Total RNA was isolated and purified  
8 from each treatment group using RLT buffer (Qiagen) and the RNeasy mini kit (Qiagen,  
9 Valencia, CA). We then synthesized the complementary DNA using the iScript RT kit (Biorad).  
10 For cDNA from the ATII primary alveolar epithelial cell, we used custom QPCR plates (Biorad)  
11 to perform an analysis of inflammatory genes of interest. The genes included were the following:  
12 Ccl12, Ccl2, Ccl20, Ccl3, Ccl4, Ccl6, Ccl7, Ccl9, Ccr1, Csf1, Il10rb, Il15, Il1a, Il1r1, Il2rg, Il6st,  
13 Sgpp1, Tnfrsf11b, and Vegfa. Additional primers for analysis of ER stress-related genes, CHOP  
14 and ATF4, were purchased from Integrated DNA Technologies. QPCR was performed using  
15 Sybr Green (Applied Biosystems) and the CFX96 Touch™ Real-Time PCR Detection System  
16 (Biorad). Data was analyzed using the  $2^{-\Delta\Delta CT}$  method, and target genes were normalized to two  
17 housekeeping genes using ribosomal 18s and GAPDH.

18  
19 **Inflammatory Mediator Analysis:** We measured the concentrations of MCP-1 (CCL2) and  
20 MIP-1 $\beta$  (CCL4) inflammatory cytokines in the collected cell media of each experimental group  
21 using MCP-1 (DY479) and MIP-1 $\beta$  (DY451) Mouse DuoSet ELISA kits (R&D Systems)  
22 according to the manufacturer's instructions.

23

1 **Monocyte Invasion Assay:** Bone marrow derived monocytes (BMDMs) were isolated from  
2 young (8 weeks) and old (20 months) C57BL/6J mice, as described by Trouplin et al (57).  
3 Monocyte migration was then evaluated using an invasion assay, performed as described by  
4 Murray et al (44), with minor modifications. BMDMs were seeded at a density of  $1 \times 10^5$   
5 cells/100ul BMDM growth media without FBS, on Collagen I-coated (Sigma-Aldrich)  
6 Transwell inserts with 8.0 um pore sizes (Corning, USA). 0.6 ml of BEGM or conditioned media  
7 from the ATII 24 hour groups were placed in the reservoir.

8 A Live/Dead Viability Assay (ThermoFisher) was used to quantify cell invasion through  
9 the Transwell membrane. Live/Dead images were taken immediately after the staining  
10 procedure an Olympus IX71 Microscope (Olympus). Total cell counts were performed using  
11 ImageJ's particle analysis function with the following inclusion parameters: Size (in Pixels): 10-  
12 120. Circularity: 0.10-0.99.

13

#### 14 **Statistics:**

15 A total of 114 young and old mice were used for this study. All experiments were performed  
16 with a minimum of n=3 primary cell isolations in triplicate wells. Larger n values were utilized  
17 where possible. Limitations exist in the number of 20-month-old mice available from the  
18 National Institute on Aging. Therefore minimum numbers to achieve statistical significance via a  
19 power analysis were utilized. Results are presented as mean +/- SD. GraphPad Prism was used  
20 for all statistical analyses. For multiple-group comparisons, we used a two-way analysis of  
21 variance (ANOVA) with age and stretch as factors, followed by a post-hoc Tukey test to  
22 determine significance. P<0.05 was considered statistically significant.

23



## 1 **Results**

2           We quantified inflammatory gene expression involved in leukocyte recruitment and  
3 injury signaling. We used these inflammatory arrays to compare the gene expression profile of  
4 mechanically stretched alveolar epithelial type II (ATII) cells to that of static controls. Fold  
5 changes of gene expression for ATII cells stretched or static for 4 hours are shown in Figure 1  
6 for the following genes: Monocyte Chemoattractant Protein 1 (MCP-1/CCL2), Macrophage  
7 Inflammatory Protein 1 alpha (MIP-1 $\alpha$ /CCL3), Macrophage Inflammatory Protein 1 beta (MIP-  
8 1 $\beta$ /CCL4), Monocyte Chemotactic Protein 3 (MCP-3/CCL7), Monocyte Chemotactic Protein 5  
9 (MCP-5/CCL12), Macrophage Inflammatory 3 alpha (MIP-3 $\alpha$ /CCL20), and Interleukin 6 (IL-6).  
10 Fold changes in gene expression are compared to the Young AT2 static group. Age and stretch  
11 resulted in significant increases in gene expression for MCP-1, MIP-1 $\alpha$ , and MCP-5. MCP-3  
12 showed significantly increased gene expression between Young and Old static groups and  
13 between Young static and Young stretched, but not between Young static and Old Stretch, or  
14 Old static and Old stretched groups. MIP-1 $\beta$  and MIP-3 $\alpha$  resulted in significantly increased gene  
15 expression between Young static and Young stretched cells, Old static and Old stretched cells,  
16 and Young and Old stretched cells. However, there was no significant difference in MIP-1 $\beta$  or  
17 MIP-3 $\alpha$  gene expression between Young and Old static groups. Interleukin 6 signal transducer  
18 (IL-6st) activation depends upon the binding of cytokines to the IL-6 receptor, which is involved  
19 in a wide variety of inflammatory disease states, including VILI (24). IL-6st was also  
20 significantly upregulated in our old static cells compared to young static cells; however, there  
21 was no difference with stretch. There were no statistically significant changes in the other genes  
22 we examined between any groups; therefore, they are not shown in Figure 1.

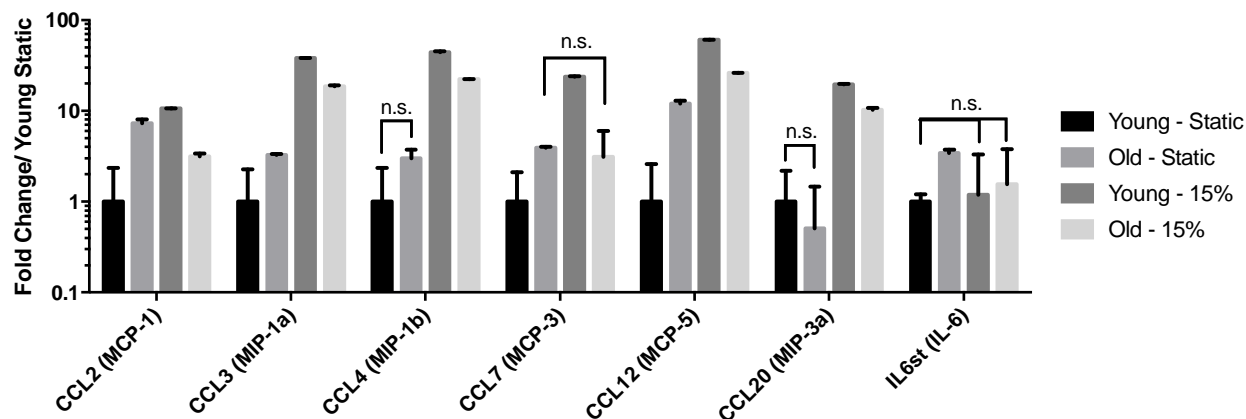

1  
2 **Figure 1: Cyclic Stretch (15%) +/- Age Upregulate Inflammatory Gene Expression in ATII**  
3 **cells at 4 hours.** Columns are fold change differences in gene expression compared with Young  
4 Static placed on a log10 scale to observe large changes in expression. Data are presented as mean  
5 +/- st. deviation,  $n \geq 3$  per group. Unless noted with n.s., representing no significance, each  
6 group was significantly different,  $p < 0.05$ , compared with all other groups.  
7

8           After quantifying cytokine gene expression, we examined ER stress as a potential  
9 regulator. In order to evaluate alveolar epithelial ER stress responses of cells exposed to  
10 mechanical stretch, we investigated the expression of two key indicators of the ER stress  
11 pathway: Activating Transcription Factor 4 (ATF4) and C/EBP homologous protein expression  
12 (CHOP) (Fig 2). We compared the young and old gene expression of both CHOP and ATF4  
13 between stretched and statically cultured cells. We observed significantly increased CHOP in  
14 response to advanced age alone, mechanical stretch alone, and in combination. CHOP is a  
15 transcription factor activated by ER stress, which is believed to help mediate cellular apoptosis  
16 and inflammation (17). Interestingly, we did not see the same age- and stretch-induced  
17 upregulation with ATF4, which is another known marker for the ER stress response. However,  
18 we observed significantly increased ATF4 expression in the old cells in response to mechanical  
19 stretch. After administrating 4-PBA, we observed significant decreases in the ER stress marker  
20 CHOP in young and old cells that received mechanical stretch and in statically cultured old cells;  
21 however, CHOP expression did not change in statically cultured young cells (Fig 2). 4-PBA

- 1 administration also attenuated increased ATF4 expression in the old stretched cells; however,
- 2 there was no change in young stretched cells, or in the statically cultured cells.

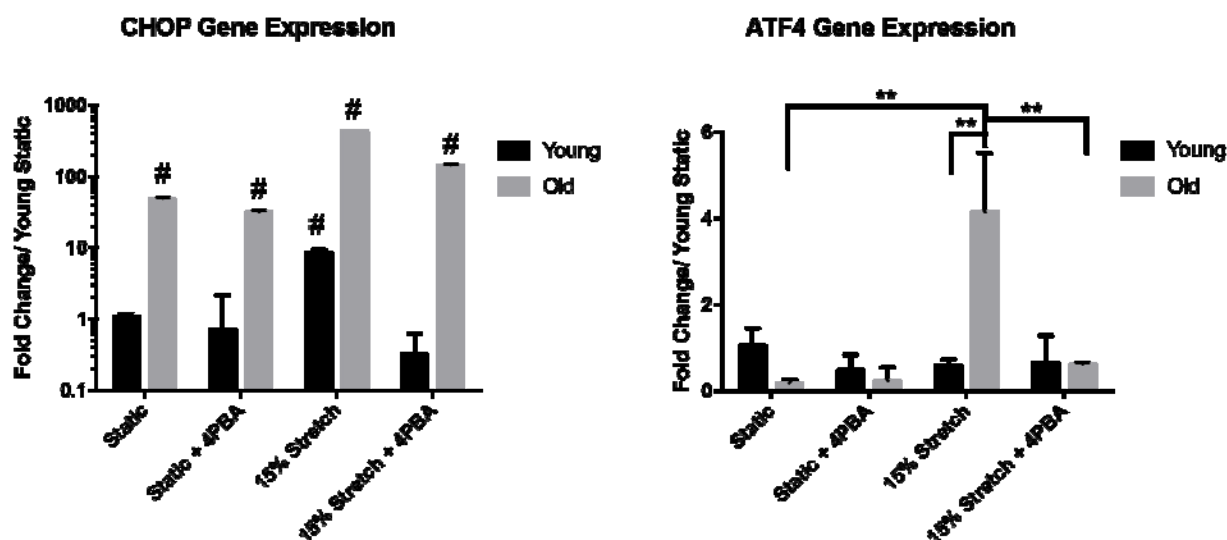

3  
4 **Figure 2: (A) CHOP and (B) ATF4 gene expression after 24 hours of stretch or static**  
5 **culture +/- 4-PBA.** Columns are fold change differences in gene expression to young static1.  
6 CHOP is shown on a log10 scale to observe large changes in gene expression. Data are presented  
7 as mean +/- st. deviation,  $n \geq 3$  per group. (A) #  $p < 0.0001$  compared with all other groups with  
8 symbol, (B) \*\* =  $p < 0.01$ , as indicated.

9  
10 The same trends in ATF4 and CHOP gene expression were observed through  
11 immunofluorescent staining. Old ATII cells were more positively stained for CHOP under static  
12 conditions when compared to the Young ATII cells (Fig. 3A and 3E). Also, the presence of CHOP is  
13 more accentuated with stretch in the Young ATII cells (Fig. 3A and 3C). Additionally, 4-PBA  
14 attenuated CHOP (Fig. 3B, 3D, 3F, and 3H) compared to vehicle controls (Fig. 3A, 3C, 3E, and  
15 3G). Similarly, Old ATII cells were more positively stained for ATF4 under static conditions  
16 when compared to the young (Fig. 3I and 3M), though the difference is less pronounced  
17 compared to the CHOP stained images. Similarly, the presence of ATF4 is more accentuated  
18 with stretch in the Old ATII cells (Fig. 3M and 3O). 4-PBA also attenuated the positive staining of  
19 ATF4 (Fig. 3B, 3D, 3F, and 3H) compared to vehicle controls (Fig. 3A, 3C, 3E, and 3G).

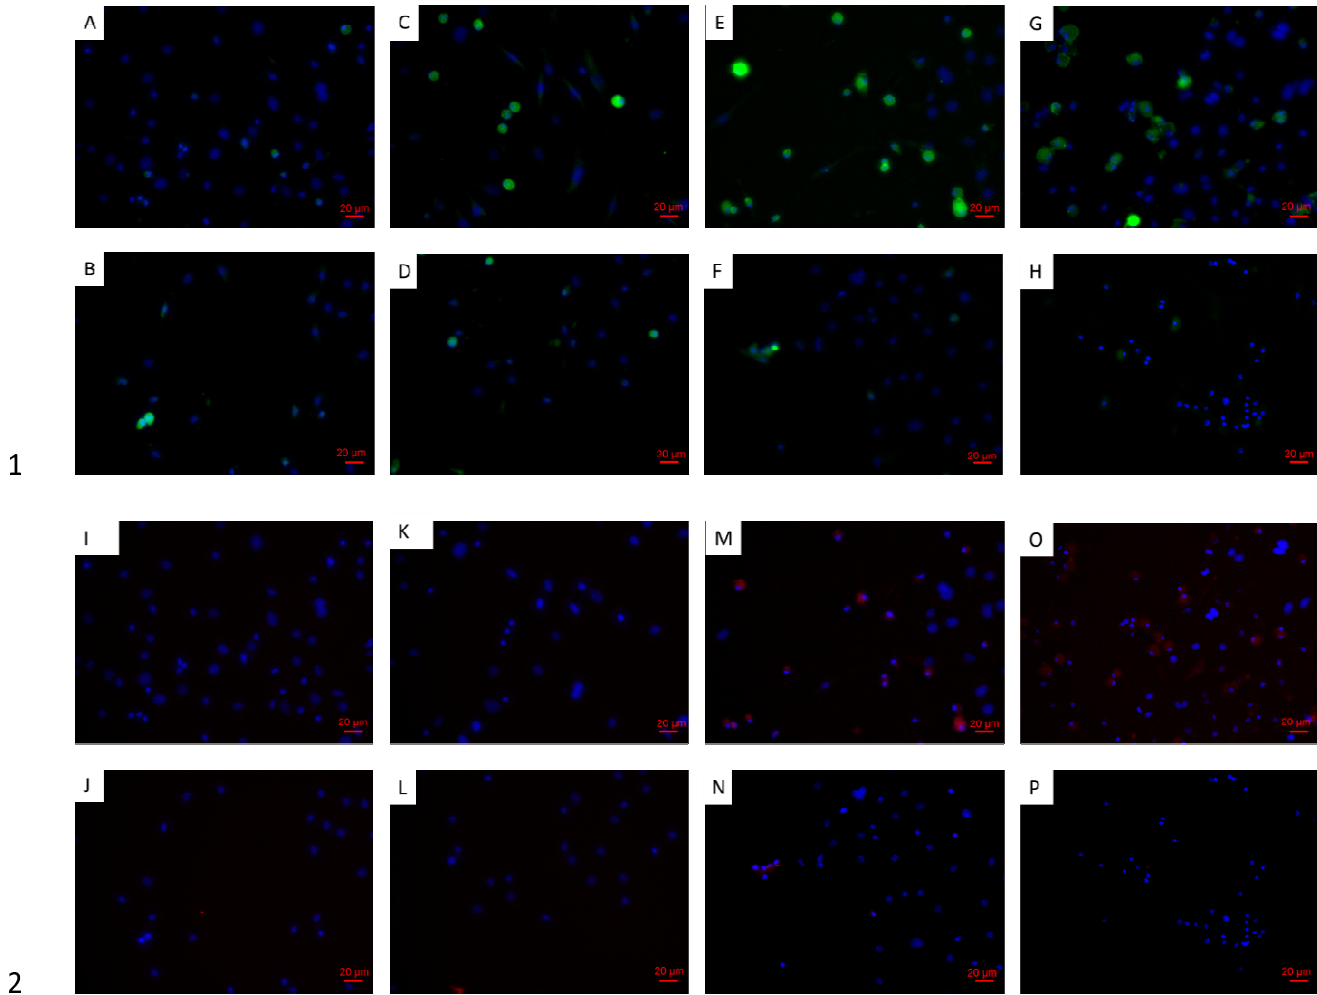

3 **Figure 3: Cyclic Stretch (15%) for 24hrs +/- Age influences detection of (A-H) CHOP and**  
4 **(I-P) ATF4 in ATII Cells.** Representative images were chosen from 3 wells stained per each  
5 experimental condition: A&I: Young Static, B&J: Young Static + 4PBA, C&K: Young Stretch,  
6 D&L: Young Stretch + 4PBA, E&M: Old Static, F&N: Old Static + 4PBA, G&O: Old Stretch,  
7 and H&P: Old Stretch + 4PBA. (A-H): DAPI (blue) and CHOP (green). (I-P): DAPI (blue) and  
8 ATF4 (red). Scale bars represent 20  $\mu\text{m}$ .

9

10 We then examined the influence of 4PBA on two key factors that would influence  
11 inflammatory cell recruitment, MCP-1 (CCL2) and MIP-1 $\beta$  (CCL4), which we also saw  
12 influenced by age and mechanical stretch (Fig 1). Gene expression for MCP-1 remained  
13 significantly elevated after 24 hours when comparing stretched Old ATII cells to static Old ATII  
14 cells. Furthermore, MCP-1 (CCL2) gene expression was significantly increased in Old ATII cells  
15 to Young ATII cells with mechanical stretch; however, there was no significant difference in

1 gene expression between Old ATII and Young ATII static cells or between Young stretched and  
2 static ATII cells (Fig 4A). 4-PBA significantly decreased MCP-1 gene expression in stretched  
3 Old ATII cells, but 4-PBA did not significantly decrease MCP-1 gene expression in the stretched  
4 Young ATII cells or the young and old static cells (Fig. 4A). Differing from the gene expression  
5 at 4 (Fig. 1) or 24 (Fig. 4A) hours, MCP-1 concentration in the media was significantly higher  
6 after 24 hours in stretched Young ATII cells compared to static Young ATII cells or stretched  
7 Old ATII cells (Fig. 4B). 4-PBA significantly lowered MCP-1 secretion in both static and  
8 stretched Young and Old ATII cells (Fig. 4B).

9 Mechanical stretch significantly increased MIP-1 $\beta$  (CCL4) gene expression after 24  
10 hours in Young ATII cells (Fig. 4C). Age significantly increased MIP-1 $\beta$  gene expression,  
11 regardless of mechanical stretch condition (Fig. 4 C). The administration of 4-PBA attenuated  
12 the increased MIP-1 $\beta$  expression in static or stretched old cells; however, there were no  
13 significant differences seen in static or stretched Young ATII cells. Concurrent with the gene  
14 expression data for 4 (Fig. 1) and 24 hours (Fig. 4C), MIP-1 $\beta$  cytokine concentration in the  
15 media was elevated after 24 hours in stretched and static Old ATII cells compared to stretched  
16 and static Young ATII cells (Fig. 4D). Additionally, the administration of 4-PBA decreased both  
17 MIP-1 $\beta$  concentrations in all groups (Fig. 4D).

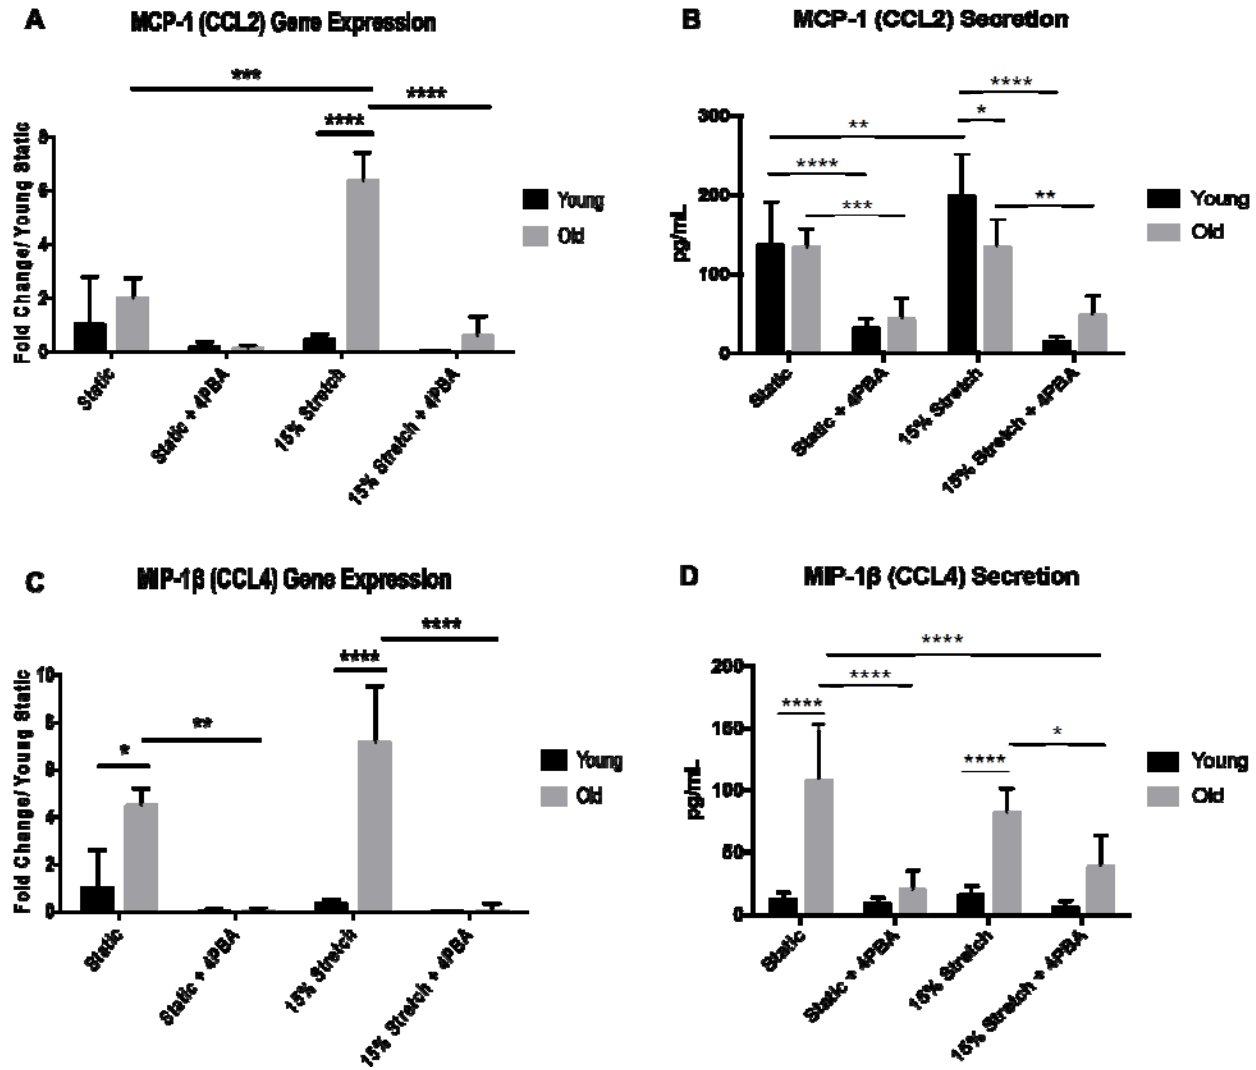

1

2

3 **Figure 4: (A) MCP-1 (CCL2) gene expression and (B) cytokine secretion and (C) MIP-1β**  
 4 **(CCL4) gene expression (D) and cytokine secretion in ATII cells after 24 hours.** Gene  
 5 expression data are fold change compared with static Young. Data are presented as mean +/- st.  
 6 deviation, n ≥ 3 per group, in triplicate. \* = p<0.05, \*\* = p<0.01, \*\*\* = p<0.001, \*\*\*\* =  
 7 p<0.0001 as indicated.

8

9 In order to determine the ability of age and stretch to influence ATII recruitment of  
 10 monocytes, we performed conditioned media experiments by exposing primary BMDMs to ATII  
 11 conditioned media (CM) from all groups. We first quantified Young and Old BMDM migration  
 12 using age-matched CM from the ATII stretch experiments (Fig. 5). We observed significantly  
 13 decreased (p<0.05) BMDM migration with old BMDMs/old static ATII CM in comparison to

1 young BMDMs/young ATII static CM. We also observed this same significant decrease  
2 ( $p < 0.05$ ) in migration with old BMDMs/old stretch CM in comparison to young BMDMs/young  
3 ATII stretch CM. There was also a significant reduction in migration with young BMDMs/young  
4 ATII static CM + 4-PBA in comparison to young BMDMs/young ATII static CM. This same  
5 reduction in migration with 4-PBA was also observed in young BMDMs/young ATII stretch CM  
6 in comparison to young BMDMs/young ATII stretch CM. Although not statistically significant,  
7 4-PBA appeared to decrease both Young and Old BMDM migration in response to Old ATII CM  
8 (Fig. 5).

9         In order to determine if it was the age of the ATII cells producing the CM or the age of  
10 the BMDMs that influenced migration, we quantified migration of young BMDMs with CM  
11 from the old stretch and static groups and old BMDMs with conditioned media from the young  
12 stretch and static groups to represent Mis-matched CM monocyte recruitment (Fig. 5, gray bars  
13 in Young ATII and black bars in Old ATII). Old BMDMs/young ATII stretch CM significantly  
14 increased migration,  $p < 0.05$ , compared with to young BMDMs/old ATII stretch CM. 4-PBA  
15 significantly decreased migration in the Old BMDMs/young ATII stretch groups (Fig. 5).  
16 Notably, Old ATII CM with Young and Old BMDM caused a significant decrease in migration  
17 compared with Young ATII CM in both stretched and static groups (as indicated by “sy”, Fig. 5).

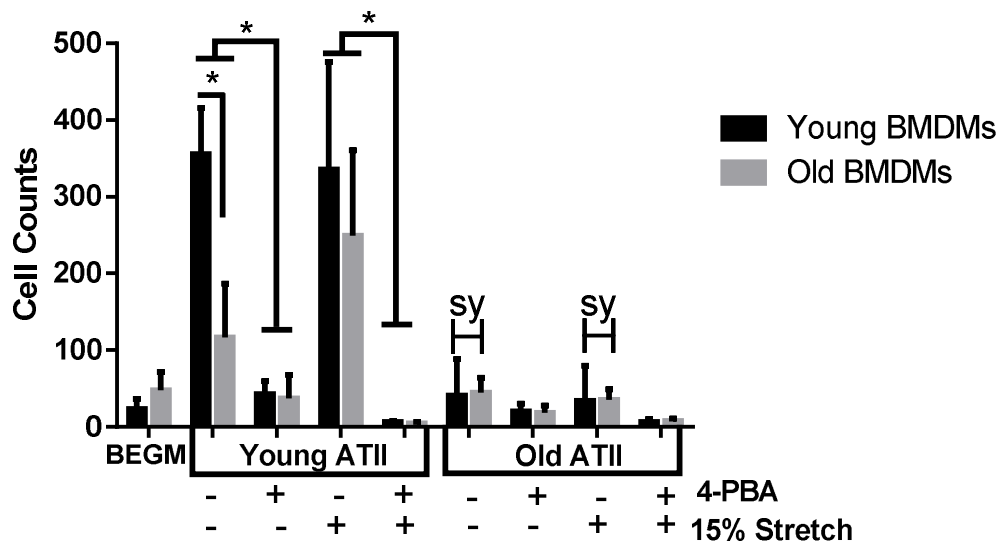

1

2 **Figure 5: Monocyte Migration with Age-Matched and Mis-Matched ATII Conditioned**  
 3 **Media.** BEGM is ATII growth media. Data are presented as mean +/- st. deviation, n ≥ 3 per  
 4 group \*p<0.01, “sy”=statistically significant with p<0.05 compared with Young ATII  
 5 counterpart. Additional statistically significant differences are described in the Results section.  
 6

7 **Discussion**

8 VILI is characterized by an influx of inflammatory cytokines, loss of alveolar barrier  
 9 integrity with pulmonary edema formation, and altered tissue mechanics. Mechanical ventilation  
 10 causes alveolar overdistension and other types of lung injury in inflamed regions of the lung  
 11 (56). The over-distension of aerated lung regions generates abnormally large mechanical  
 12 stretching forces on the epithelium that causes an immense secretion of proinflammatory  
 13 cytokines and increased permeability (11, 33). Implementing “protective ventilator strategies”  
 14 has only marginally improved negative outcomes, and the overall mortality rates for ventilated  
 15 patients are still unacceptably high (38, 50). Furthermore, few studies are performed on aged  
 16 subjects, which is incongruent with the fact that elderly patients have a greater need for  
 17 mechanical ventilation (3, 18) . These observations illustrate the major clinical need to develop  
 18 treatments or therapies that prevent the cellular injury mechanisms and inflammation directly



1 resulting from the pathological mechanical forces generated during mechanical ventilations.

2           We began our study screening for a number of inflammatory cytokines with gene  
3 expression. This screening identified a number of genes age-responsive and stretch-responsive in  
4 AII cells. In statically culture, we observed a significant increase in the expression of MCP-  
5 1(CCL2), MIP-1 $\alpha$  (CCL3), MCP-3 (CCL7), MIP-3 $\alpha$  (CCL12), and IL-6st with age. These genes  
6 are associated with cytokines and chemokines that result in an increased level of inflammation in  
7 the lung (26, 39, 41). MCP-1, MIP-1 $\alpha$ , and MCP-5 all showed increased gene expression with  
8 age alone, mechanical stretch alone, and with the combination of age and stretch. MCP-1 is a  
9 well-studied chemokine that is believed to assist in the recruitment of monocytes, memory T  
10 cells, and dendritic cells to sites of inflammation in response to tissue injury or infection (65). It  
11 has also been shown to increase in aged mice in response to injury or infection (52). Other  
12 studies have shown increased MCP-1, MIP-1 $\alpha$ , and IL-6 in experimental VILI models (43).  
13 Additionally, MCP-1, MIP-1 $\alpha$ , MIP-3 $\alpha$ , and IL-6 increase in human epithelial cell and fibroblast  
14 cellular senescence (22). Furthermore, we observed increased MIP-1 $\beta$  (macrophage  
15 inflammatory protein-1 $\beta$ ) and MIP-3 $\alpha$  (macrophage inflammatory protein-3 $\alpha$ ) expression in  
16 response to mechanical stretch. MIP-1 $\beta$  is believed to be a chemoattractant for monocytes,  
17 natural killer cells, and other immune cell participants (5, 59). While all of these cytokines and  
18 chemokines likely play a role in VILI, we selected MCP-1 and MIP-1 $\beta$  as the targets for further  
19 study in age-associated ER stress and inflammatory experiments. In addition to its role in  
20 monocyte/macrophage recruitment (52), numerous studies indicate that MCP-1 is significantly  
21 increased in experimental models of mechanically ventilated mice (27, 28, 30), cyclically  
22 stretched murine and human endothelial cells (9, 48, 60), and in lipopolysaccharide (LPS)-  
23 induced acute lung injury models using lung epithelial cells (32, 53, 64). While MIP-1 $\beta$  also

1 plays a role in monocyte/macrophage recruitment, studies demonstrate that it is also increased in  
2 experimental acute lung injury models (5, 25).

3 We investigated ER stress as a mediator of the stretch and age-induced inflammation  
4 because ER stress plays a significant contributory role in age-related diseases and chronic  
5 inflammation (6, 23). Conditions such as hypoxia, calcium ion depletion, oxidative injury,  
6 infections, and inflammatory cytokines have the ability to disrupt the ER and prevent the normal  
7 protein folding (4, 7). The accumulation of folded and misfolded proteins in the ER leads to ER  
8 stress. Failure of the cell to mitigate protein accumulation leads to inflammatory pathway  
9 activation (37). Age and/or mechanical stretch likely further disrupt the epithelial cells' ability to  
10 alleviate the unfolded and misfolded protein accumulation in the ER, which leads to intensified  
11 inflammation and apoptosis that contribute to barrier dysfunction and increased permeability.  
12 While it has been recently shown that ER stress regulates alveolar epithelial homeostasis in  
13 response to mechanical stimuli (16), our current study provides the first evidence that aging  
14 significantly impacts the ER stress responses and inflammatory signaling in alveolar epithelial  
15 cells with and without the addition of mechanical stretch.

16 In order to attenuate the age-associated increases in mechanical stretch-induced ER  
17 stress and inflammation, we administered 4-PBA or vehicle to the ATII cultures. 4-PBA acts as a  
18 molecular chaperone to aid in the prevention of misfolded protein accumulation (35). 4-PBA is  
19 commercially available, approved by the FDA, clinically used to cure urea cyclic disorders (42).  
20 Additionally, several studies have already demonstrated that 4-PBA can be effective in  
21 alleviating chronic inflammation and age-related disease outcomes, such as lipopolysaccharide  
22 (LPS)-induced lung inflammation in a murine model, through mitigation of ER stress (34, 42).  
23 Based upon these prior results, we tested 4-PBA in our *in vitro* cell stretch model.

1           4-PBA induced changes in concentrations of inflammatory cytokines secreted into the  
2 cell media. MCP-1 (CCL2) and MIP-1 $\beta$  (CCL4) media concentrations were significantly  
3 decreased with the administration of 4-PBA in both stretched and statically cultured old ATII  
4 cells. 4-PBA also mitigated MCP-1 secretion in young static and stretched cells, while MIP-1 $\beta$   
5 secretion did not change in the young static or stretched cells. The reduction in these  
6 concentrations may also be the cause for the significantly reduced monocyte recruitment as well,  
7 as they are believed to help regulate monocyte and other immune cell recruitment and activation  
8 (5, 52, 54).

9           Macrophages are thought to be one of the major targets of the mechanically stretch-  
10 induced signaling mechanisms of the alveolar epithelium (55, 58). Macrophages in the alveolar  
11 space greatly contribute to barrier integrity and local inflammation as they are a major participant  
12 in inflammatory signaling between the epithelium and innate immune response (8, 10). We  
13 investigated the impact of age and/or stretch on monocyte recruitment using BMDMs to  
14 understand the interaction between macrophages and epithelial cell signaling. We chose to use  
15 this primary cell type in order to examine age-related differences. Large quantities are more  
16 easily obtained with BMDMs compared with alveolar macrophages, and they are more suitable  
17 for microscopy applications (57). Based on our age-matched data alone, we were unable to  
18 determine if it was the age of the BMDMs or the age of the epithelial cells that elicited the  
19 significantly different responses. Our age mismatched experiments (Fig. 5) suggest that age of  
20 the ATII cells may have a greater impact on BMDM recruitment than the age of the BMDMs  
21 themselves. Administration of 4-PBA significantly reduced BMDM recruitment with young  
22 BMDMs/young static CM, young BMDMs/young stretch CM, and with old BMDMs/young  
23 stretch CM. These results indicate that 4-PBA may quell inflammation and macrophage

1 recruitment in stretch injury.

2           There are some additional limitations in this the study. Multiple studies have suggested  
3 that 15% stretch is insufficient to injure young alveolar epithelial cells (11, 15). This possibility  
4 might explain why we did not see the same inflammatory or ER stress response changes that we  
5 observed in the old ATII cells. However, our results suggest that advanced age impacts  
6 inflammatory and ER stress activation in ATII cells in response to mechanical stimuli. We have  
7 shown previously that while cell membrane integrity is retained, cyclic stretch of young ATII  
8 cells at 15% change in surface area is sufficient to affect gene expression and phenotype (29).  
9 Our results indicate that old ATII cells respond differently to mechanical stretch compared with  
10 young ATII cells, potentially indicating that even under low tidal volume mechanical ventilation,  
11 older subjects may have an altered inflammatory response.

12           As the compounding effects of aging on lung injury and inflammation are becoming  
13 increasingly recognized, these age-dependent factors that may be associated with the injury and  
14 inflammation responses between the alveolar epithelium and innate immune system still need  
15 more clarity. While the administration of 4-PBA shows promise in treating the ER stress and  
16 inflammation responses following mechanical stretch, the age- and stretch-dependent  
17 mechanisms and the use of 4-PBA to mitigate inflammation and ER stress require further study  
18 to prove their practicality for future lung injury-related clinical potential.

19

## 20 **Acknowledgements:**

21 The authors acknowledge the assistance of Niraja Bohidar in aiding in cell isolation experiments.  
22 This research was supported by the National Institutes of Health under Award Number  
23 R01AG041823. The content is solely the responsibility of the authors and does not necessarily

1 represent the official views of the National Institutes of Health.

2

3

#### 4 **References Cited**

5

- 6 1. **Andrade PV, Santos JM dos, Silva HCA, Wilbert DD, Cavassani SS, Oliveira-Júnior**  
7 **IS.** Influence of Hyperoxia and Mechanical Ventilation in Lung Inflammation and  
8 Diaphragm Function in Aged Versus Adult Rats. *Inflammation* 37: 486–494, 2013.
- 9 2. **Aoshiba K, Nagai A.** Chronic lung inflammation in aging mice. *FEBS Lett* 581: 3512–3516,  
10 2007.
- 11 3. **Benhamou D, Muir JF, Melen B.** Mechanical ventilation in elderly patients. *Monaldi Arch*  
12 *Chest Dis Arch Monaldi Mal Torace* 53: 547–551, 1998.
- 13 4. **Bhandary B, Marahatta A, Kim H-R, Chae H-J.** An Involvement of Oxidative Stress in  
14 Endoplasmic Reticulum Stress and Its Associated Diseases. *Int J Mol Sci* 14: 434, 2013.
- 15 5. **Bless NM, Huber-Lang M, Guo R-F, Warner RL, Schmal H, Czermak BJ, Shanley TP,**  
16 **Crouch LD, Lentsch AB, Sarma V, Mulligan MS, Friedl HP, Ward PA.** Role of CC  
17 Chemokines (Macrophage Inflammatory Protein-1 $\beta$ , Monocyte Chemoattractant Protein-1,  
18 RANTES) in Acute Lung Injury in Rats. *J Immunol* 164: 2650–2659, 2000.
- 19 6. **Brown MK, Naidoo N.** The endoplasmic reticulum stress response in aging and age-related  
20 diseases. *Front Physiol* 3: 263, 2012.
- 21 7. **Brozzi F, Nardelli TR, Lopes M, Millard I, Barthson J, Igoillo-Esteve M, Grieco FA,**  
22 **Villate O, Oliveira JM, Casimir M, Bugliani M, Engin F, Hotamisligil GS, Marchetti**  
23 **P, Eizirik DL.** Cytokines induce endoplasmic reticulum stress in human, rat and mouse  
24 beta cells via different mechanisms. *Diabetologia* 58: 2307–2316, 2015.
- 25 8. **Canan CH, Gokhale NS, Carruthers B, Lafuse WP, Schlesinger LS, Torrelles JB,**  
26 **Turner J.** Characterization of lung inflammation and its impact on macrophage function in  
27 aging. *J Leukoc Biol* 96: 473–480, 2014.
- 28 9. **Chen W, Epshtein Y, Ni X, Dull RO, Cress AE, Garcia JGN, Jacobson JR.** Role of  
29 Integrin  $\beta$ 4 in Lung Endothelial Cell Inflammatory Responses to Mechanical Stress. *Sci*  
30 *Rep* 5, 2015.
- 31 10. **Childs LM, Paskow M, Jr SMM, Hesse M, Strogatz S.** From Inflammation to Wound  
32 Healing: Using a Simple Model to Understand the Functional Versatility of Murine  
33 Macrophages. *Bull Math Biol* 73: 2575–2604, 2011.
- 34 11. **Cohen TS, Cavanaugh KJ, Margulies SS.** Frequency and peak stretch magnitude affect  
35 alveolar epithelial permeability. *Eur Respir J* 32: 854–861, 2008.

- 1 12. **Corti M, Brody AR, Harrison JH.** Isolation and primary culture of murine alveolar type II  
2 cells. *Am J Respir Cell Mol Biol* 14: 309–315, 1996.
- 3 13. **Corvol H, Flamein F, Epaud R, Clement A, Guillot L.** Lung alveolar epithelium and  
4 interstitial lung disease. *Int J Biochem Cell Biol* 41: 1643–1651, 2009.
- 5 14. **Criswell DS, Shanely RA, Betters JJ, McKenzie MJ, Sellman JE, Van Gammeren DL,  
6 Powers SK.** Cumulative Effects of Aging and Mechanical Ventilation on In Vitro  
7 Diaphragm Function. *Chest* 124: 2302–2308, 2003.
- 8 15. **Davidovich N, DiPaolo BC, Lawrence GG, Chhour P, Yehya N, Margulies SS.** Cyclic  
9 Stretch-Induced Oxidative Stress Increases Pulmonary Alveolar Epithelial Permeability.  
10 *Am J Respir Cell Mol Biol* 49: 156–164, 2013.
- 11 16. **Dolinay DT, Himes DBE, Shumyatcher MM, Lawrence MGG, Margulies PSS.**  
12 Integrated Stress Response Mediates Epithelial Injury In Mechanical Ventilation. *Am. J.*  
13 *Respir. Cell Mol. Biol.* ( March 31, 2017). doi: 10.1165/rcmb.2016-0404OC.
- 14 17. **Endo M, Oyadomari S, Suga M, Mori M, Gotoh T.** The ER Stress Pathway Involving  
15 CHOP Is Activated in the Lungs of LPS-Treated Mice. *J Biochem (Tokyo)* 138: 501–507,  
16 2005.
- 17 18. **Esteban A, Anzueto A, Frutos F, Alía I, Brochard L, Stewart TE, Benito S, Epstein SK,  
18 Apezteguía C, Nightingale P, Arroliga AC, Tobin MJ, Group for the MVIS.**  
19 Characteristics and Outcomes in Adult Patients Receiving Mechanical Ventilation: A 28-  
20 Day International Study. *JAMA* 287: 345–355, 2002.
- 21 19. **Fan E, Needham DM, Stewart TE.** Ventilatory management of acute lung injury and acute  
22 respiratory distress syndrome. *JAMA* 294: 2889–2896, 2005.
- 23 20. **Feng Y, Amoateng-Adjepong Y, Kaufman D, Gheorghe C, Manthous CA.** Age, Duration  
24 of Mechanical Ventilation, and Outcomes of Patients Who Are Critically Ill. *Chest* 136:  
25 759–764, 2009.
- 26 21. **Franceschi C, Campisi J.** Chronic Inflammation (Inflammaging) and Its Potential  
27 Contribution to Age-Associated Diseases. *J Gerontol A Biol Sci Med Sci* 69: S4–S9, 2014.
- 28 22. **Freund A, Orjalo AV, Desprez P-Y, Campisi J.** Inflammatory networks during cellular  
29 senescence: causes and consequences. *Trends Mol Med* 16: 238–246, 2010.
- 30 23. **Garg AD, Kaczmarek A, Krysko O, Vandenabeele P, Krysko DV, Agostinis P.** ER  
31 stress-induced inflammation: does it aid or impede disease progression? *Trends Mol Med*  
32 18: 589–598, 2012.
- 33 24. **Goldman JL, Sammani S, Kempf C, Saadat L, Letsiou E, Wang T, Moreno-Vinasco L,  
34 Rizzo AN, Fortman JD, Garcia JGN.** Pleiotropic effects of interleukin-6 in a “two-hit”  
35 murine model of acute respiratory distress syndrome. *Pulm Circ* 4: 280, 2014.

- 1 25. **Guo R-F, Lentsch AB, Warner RL, Huber-Lang M, Sarma JV, Hlaing T, Shi MM,**  
2 **Lukacs NW, Ward PA.** Regulatory Effects of Eotaxin on Acute Lung Inflammatory  
3 Injury. *J Immunol* 166: 5208–5218, 2001.
- 4 26. **Halbertsma FJJ, Vaneker M, Scheffer GJ, van der Hoeven JG.** Cytokines and bio-trauma  
5 in ventilator-induced lung injury: a critical review of the literature. *Neth J Med* 63: 382–  
6 392, 2005.
- 7 27. **Hawwa RL, Hokenson MA, Wang Y, Huang Z, Sharma S, Sanchez-Esteban J.** IL-10  
8 inhibits inflammatory cytokines released by fetal mouse lung fibroblasts exposed to  
9 mechanical stretch. *Pediatr Pulmonol* 46: 640, 2011.
- 10 28. **Hegeman MA, Hennis MP, Meurs M van, Cobelens PM, Kavelaars A, Jansen NJ,**  
11 **Schultz MJ, Vught AJ van, Molema G, Heijnen CJ.** Angiopoietin-1 Treatment Reduces  
12 Inflammation but Does Not Prevent Ventilator-Induced Lung Injury. *PLoS ONE* 5, 2010.
- 13 29. **Heise RL, Stober V, Chelvaraju C, Hollingsworth JW, Garantziotis S.** Mechanical  
14 Stretch Induces Epithelial-Mesenchymal Transition in Alveolar Epithelia via Hyaluronan  
15 Activation of Innate Immunity. *J Biol Chem* 286: 17435–17444, 2011.
- 16 30. **Helmerhorst HJF, Schouten LRA, Wagenaar GTM, Juffermans NP, Roelofs JJTH,**  
17 **Schultz MJ, Jonge E de, Westerloo DJ van.** Hyperoxia provokes a time- and dose-  
18 dependent inflammatory response in mechanically ventilated mice, irrespective of tidal  
19 volumes. *Intensive Care Med Exp* 5: 27, 2017.
- 20 31. **Herbert JA, Valentine MS, Saravanan N, Schneck MB, Pidaparti R, Fowler AA,**  
21 **Reynolds AM, Heise RL.** Conservative fluid management prevents age-associated  
22 ventilator induced mortality. *Exp Gerontol* 81: 101–109, 2016.
- 23 32. **Jia C-E, Jiang D, Dai H, Xiao F, Wang C.** Pendrin, an anion exchanger on lung epithelial  
24 cells, could be a novel target for lipopolysaccharide-induced acute lung injury mice. *Am J*  
25 *Transl Res* 8: 981, 2016.
- 26 33. **Kenneth J. Cavanaugh J, Oswari J, Margulies SS.** Role of Stretch on Tight Junction  
27 Structure in Alveolar Epithelial Cells. *Am. J. Respir. Cell Mol. Biol.* ( December 14, 2012).  
28 doi: 10.1165/ajrcmb.25.5.4486.
- 29 34. **Kim HJ, Jeong JS, Kim SR, Park SY, Chae HJ, Lee YC.** Inhibition of endoplasmic  
30 reticulum stress alleviates lipopolysaccharide-induced lung inflammation through  
31 modulation of NF- $\kappa$ B/HIF-1 $\alpha$  signaling pathway. *Sci Rep* 3, 2013.
- 32 35. **Kolb PS, Ayaub EA, Zhou W, Yum V, Dickhout JG, Ask K.** The therapeutic effects of 4-  
33 phenylbutyric acid in maintaining proteostasis. *Int J Biochem Cell Biol* 61: 45–52, 2015.
- 34 36. **Korfei M, Ruppert C, Mahavadi P, Henneke I, Markart P, Koch M, Lang G, Fink L,**  
35 **Bohle R-M, Seeger W, Weaver TE, Guenther A.** Epithelial Endoplasmic Reticulum  
36 Stress and Apoptosis in Sporadic Idiopathic Pulmonary Fibrosis. *Am J Respir Crit Care*  
37 *Med* 178: 838–846, 2008.

- 1 37. **Lee AS.** The ER chaperone and signaling regulator GRP78/BiP as a monitor of endoplasmic  
2 reticulum stress. *Methods* 35: 373–381, 2005.
- 3 38. **Levy BD, Choi AMK.** Acute Respiratory Distress Syndrome | Clinical Gate [Online].  
4 *Clinicalgate*: 2015. <http://clinicalgate.com/acute-respiratory-distress-syndrome-2/> [17 Apr.  
5 2016].
- 6 39. **Lloyd C.** Chemokines in allergic lung inflammation. *Immunology* 105: 144, 2002.
- 7 40. **Luh S, Chiang C.** Acute lung injury/acute respiratory distress syndrome (ALI/ARDS): the  
8 mechanism, present strategies and future perspectives of therapies. *J Zhejiang Univ Sci B* 8:  
9 60–69, 2007.
- 10 41. **Moldoveanu B, Otmishi P, Jani P, Walker J, Sarmiento X, Guardiola J, Saad M, Yu J.**  
11 Inflammatory mechanisms in the lung. *J Inflamm Res* 2: 1, 2009.
- 12 42. **Mukai S, Ogawa Y, Urano F, Kudo-Saito C, Kawakami Y, Tsubota K.** Novel Treatment  
13 of Chronic Graft-Versus-Host Disease in Mice Using the ER Stress Reducer 4-  
14 Phenylbutyric Acid. *Sci Rep* 7: 41939, 2017.
- 15 43. **Müller HC, Hellwig K, Rosseau S, Tschernig T, Schmiedl A, Gutbier B, Schmeck B,**  
16 **Hippenstiel S, Peters H, Morawietz L, Suttorp N, Witzenrath M.** Simvastatin attenuates  
17 ventilator-induced lung injury in mice. *Crit Care* 14: R143, 2010.
- 18 44. **Murray MY, Birkland TP, Howe JD, Rowan AD, Fidock M, Parks WC, Gavrilovic J.**  
19 Macrophage Migration and Invasion Is Regulated by MMP10 Expression. *PLOS ONE* 8:  
20 e63555, 2013.
- 21 45. **Naidoo N.** ER and aging—Protein folding and the ER stress response. *Ageing Res Rev* 8:  
22 150–159, 2009.
- 23 46. **Network TARDS.** Ventilation with Lower Tidal Volumes as Compared with Traditional  
24 Tidal Volumes for Acute Lung Injury and the Acute Respiratory Distress Syndrome. *N*  
25 *Engl J Med* 342: 1301–1308, 2000.
- 26 47. **Nin N, Lorente JA, Paula M, Fernández-Segoviano P, Peñuelas O, Sánchez-Ferrer A,**  
27 **Martínez-Caro L, Esteban A.** Aging increases the susceptibility to injurious mechanical  
28 ventilation. *Intensive Care Med* 34: 923–931, 2008.
- 29 48. **Okada M, Matsumori A, Ono K, Furukawa Y, Shioi T, Iwasaki A, Matsushima K,**  
30 **Sasayama S.** Cyclic Stretch Upregulates Production of Interleukin-8 and Monocyte  
31 Chemotactic and Activating Factor/Monocyte Chemoattractant Protein-1 in Human  
32 Endothelial Cells. *Arterioscler Thromb Vasc Biol* 18: 894–901, 1998.
- 33 49. **Römisch K.** A cure for traffic jams: small molecule chaperones in the endoplasmic  
34 reticulum. *Traffic Cph Den* 5: 815–820, 2004.
- 35 50. **Ruthman CA, Festic E.** Emerging Therapies for the Prevention of Acute Respiratory



- 1           Distress Syndrome. *Ther Adv Respir Dis* 9: 173–187, 2015.
- 2   51. **Schouten LRA, Schultz MJ, van Kaam AH, Juffermans NP, Bos AP, Wösten-van**  
3       **Asperen RM.** Association between Maturation and Aging and Pulmonary Responses in  
4       Animal Models of Lung Injury: A Systematic Review. *Anesthesiology* 123: 389–408, 2015.
- 5   52. **Shallo H, Plackett TP, Heinrich SA, Kovacs EJ.** Monocyte chemoattractant protein-1  
6       (MCP-1) and macrophage infiltration into the skin after burn injury in aged mice. *Burns* 29:  
7       641–647, 2003.
- 8   53. **Shao L, Meng D, Yang F, Song H, Tang D.** Irisin-mediated protective effect on LPS-  
9       induced acute lung injury via suppressing inflammation and apoptosis of alveolar epithelial  
10      cells. *Biochem Biophys Res Commun* 487: 194–200, 2017.
- 11 54. **Shi C, Pamer EG.** Monocyte recruitment during infection and inflammation. *Nat Rev*  
12      *Immunol* 11: 762, [date unknown].
- 13 55. **Skerrett SJ, Liggitt HD, Hajjar AM, Ernst RK, Miller SI, Wilson CB.** Respiratory  
14      epithelial cells regulate lung inflammation in response to inhaled endotoxin. *Am J Physiol -*  
15      *Lung Cell Mol Physiol* 287: L143–L152, 2004.
- 16 56. **Terragni PP, Rosboch G, Tealdi A, Corno E, Menaldo E, Davini O, Gandini G,**  
17      **Herrmann P, Mascia L, Quintel M, Slutsky AS, Gattinoni L, Ranieri VM.** Tidal  
18      Hyperinflation during Low Tidal Volume Ventilation in Acute Respiratory Distress  
19      Syndrome. *Am. J. Respir. Crit. Care Med.* ( December 20, 2012). doi:  
20      10.1164/rccm.200607-915OC.
- 21 57. **Trouplin V, Boucherit N, Gorvel L, Conti F, Mottola G, Ghigo E.** Bone Marrow-derived  
22      Macrophage Production. *J Vis Exp JoVE* , 2013.
- 23 58. **Vlahakis NE, Schroeder MA, Limper AH, Hubmayr RD.** Stretch induces cytokine release  
24      by alveolar epithelial cells in vitro. *Am J Physiol - Lung Cell Mol Physiol* 277: L167–L173,  
25      1999.
- 26 59. **Wang JM, Sherry B, Fivash MJ, Kelvin DJ, Oppenheim JJ.** Human recombinant  
27      macrophage inflammatory protein-1 alpha and -beta and monocyte chemotactic and  
28      activating factor utilize common and unique receptors on human monocytes. *J Immunol*  
29      150: 3022–3029, 1993.
- 30 60. **Wung BS, Cheng JJ, Chao YJ, Lin J, Shyy YJ, Wang DL.** Cyclical strain increases  
31      monocyte chemotactic protein-1 secretion in human endothelial cells. *Am J Physiol - Heart*  
32      *Circ Physiol* 270: H1462–H1468, 1996.
- 33 61. **Xiao C, Giacca A, Lewis GF.** Sodium Phenylbutyrate, a Drug With Known Capacity to  
34      Reduce Endoplasmic Reticulum Stress, Partially Alleviates Lipid-Induced Insulin  
35      Resistance and  $\beta$ -Cell Dysfunction in Humans. *Diabetes* 60: 918, 2011.
- 36 62. **Yin L, Zheng D, Limmon GV, Leung NH, Xu S, Rajapakse JC, Yu H, Chow VT, Chen**

- 1        **J.** Aging exacerbates damage and delays repair of alveolar epithelia following influenza  
2        viral pneumonia. *Respir Res* 15, 2014.
- 3    63. **Zhong Q, Zhou B, Ann DK, Minoo P, Liu Y, Banfalvi A, Krishnaveni MS, Dubourd M,**  
4        **Demaio L, Willis BC, Kim K-J, duBois RM, Crandall ED, Beers MF, Borok Z.** Role of  
5        Endoplasmic Reticulum Stress in Epithelial–Mesenchymal Transition of Alveolar Epithelial  
6        Cells: Effects of Misfolded Surfactant Protein. *Am J Respir Cell Mol Biol* 45: 498, 2011.
- 7    64. **Zhu J-P, Wu K, Li J-Y, Guan Y, Sun Y-H, Ma W-J, Xie Q-M.** Cryptoporus volvatus  
8        polysaccharides attenuate LPS-induced expression of pro-inflammatory factors via the  
9        TLR2 signaling pathway in human alveolar epithelial cells [Online]. *Pharm. Biol.*  
10       <http://www.tandfonline.com/doi/abs/10.3109/13880209.2015.1042981> [6 Jun. 2017].
- 11   65. **van Zoelen MAD, Verstege MI, Draing C, de Beer R, Veer C van't, Florquin S, Bresser**  
12        **P, van der Zee JS, te Velde AA, von Aulock S, van der Poll T.** Endogenous MCP-1  
13        promotes lung inflammation induced by LPS and LTA. *Mol Immunol* 48: 1468–1476, 2011.
- 14
